# Supplementary material for: Integrated Metabolome and Transcriptome Analysis Uncovers the Role of Anthocyanin Metabolism in Michelia maudiae
Source: Hindawi journal article supplement (doi:10.1155/2019/4393905), 2019-11-03

## The top hit species distribution

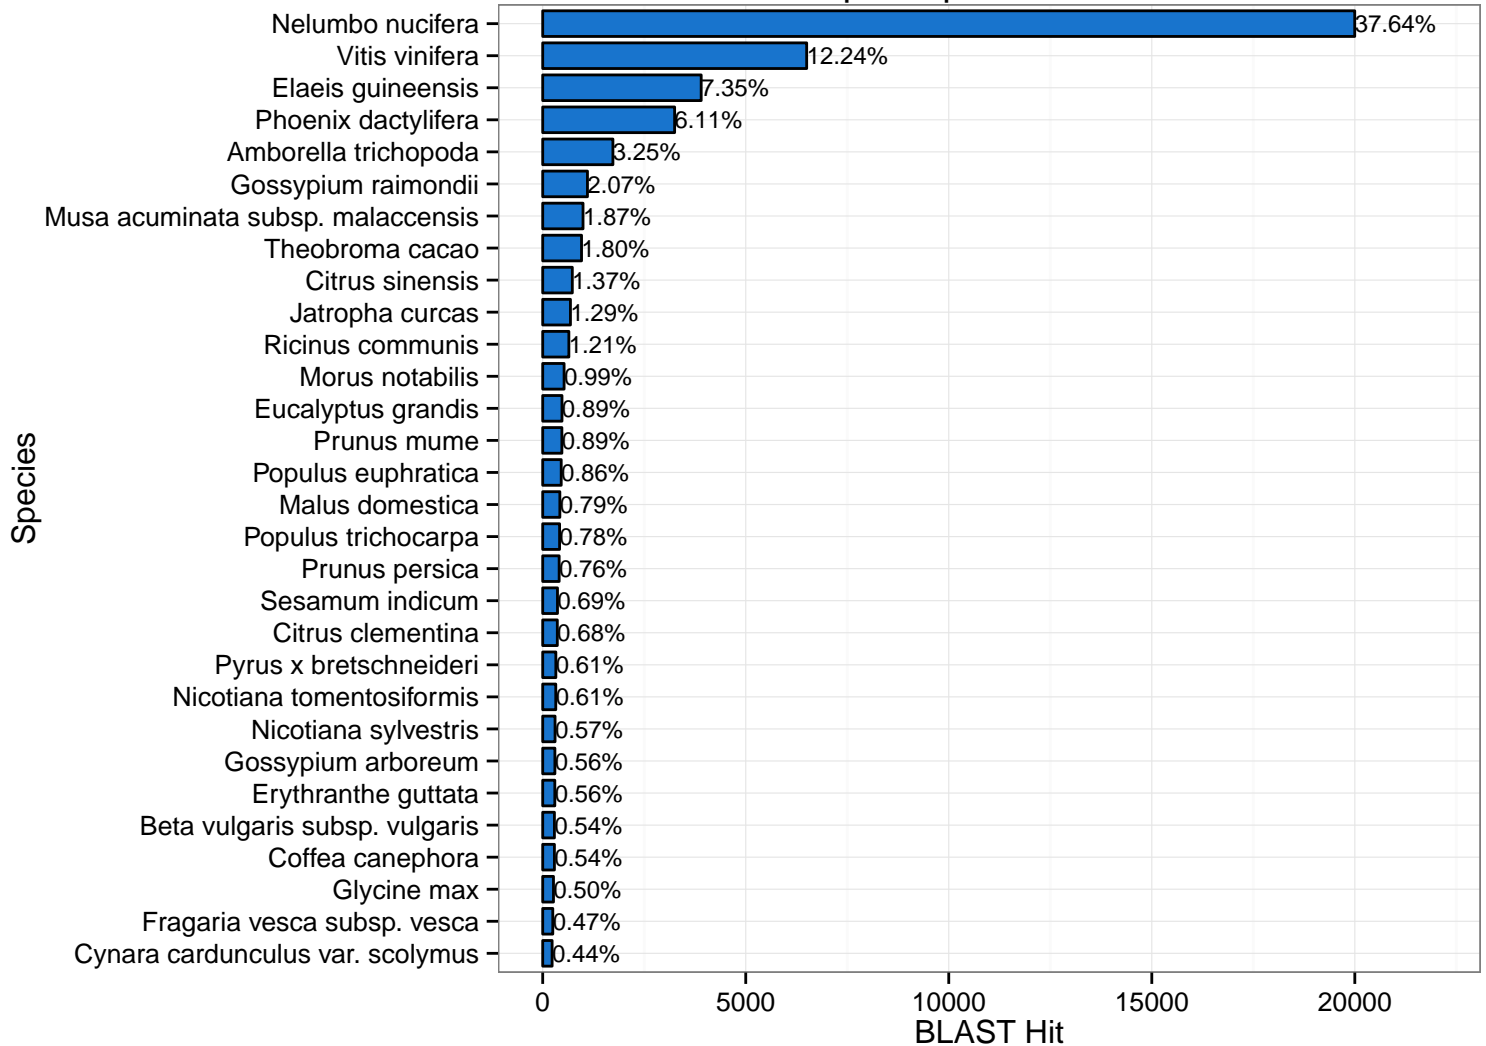

Supplement: f4 [file 4393905.f4.pdf]
