# Supplementary material for: Integrated Metabolome and Transcriptome Analysis Uncovers the Role of Anthocyanin Metabolism in Michelia maudiae
Source: Hindawi journal article supplement (doi:10.1155/2019/4393905), 2019-11-03

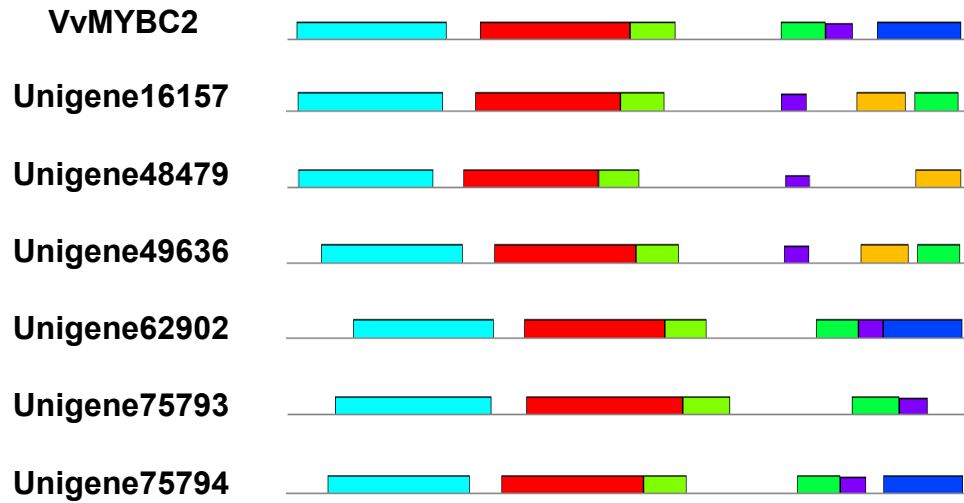

**R2 motif**

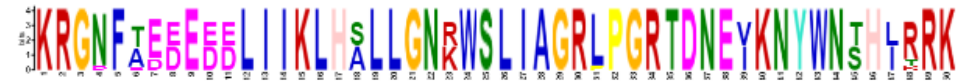

**R3 motif**

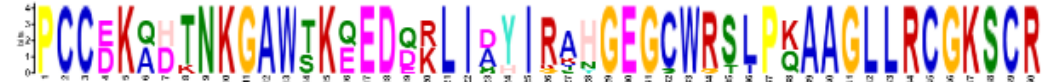

**C1**

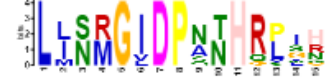

**C2 / EAR-repressor motif**

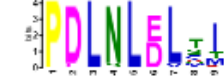

**C3 / Zinc finger-like motif**

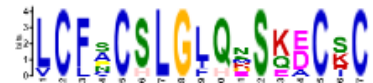

**C4**

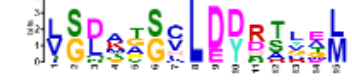

**C5 / TLLFR-repressor motif**

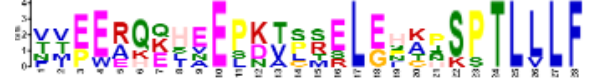

Supplement: f7 [file 4393905.f7.pdf]
