# Supplementary material for: Integrated Metabolome and Transcriptome Analysis Uncovers the Role of Anthocyanin Metabolism in Michelia maudiae
Source: Int J Genomics. 2019 Nov 3;2019:4393905. doi: 10.1155/2019/4393905 (PMC6874964; doi:10.1155/2019/4393905)
Supplement: Supplementary 9 — Table S1: developmental stages of flowers in M. maudiae. [file 4393905.f9.xlsx]

## Sheet: Supplementa Table 1
Table S1 Developmental stages of flowers in Michelia maudiae
Stage	the length of tepal (cm)		Main characters
	white flower	rubellis flower
1	<1	<1	Just sprouting flower buds without pedicels.
2	1-2	1-2	falling off a layer of bracts, beginning to form tepals, but not coloring
3	2-3	2-3	the tepals beginning to coloring.
4	3-4.5	3-4	the tepals have been completely colored and gradually become darked, the tepals is in growth greatens stage, the duration of this stage is longer.
5	5-6	4-5.5	tepals did not open within 2 days, petals are still slightly green, the duration of this stage is shorter
6	5-6.5	4-6	the tepals burst and are about to bloom for a very short time
7	5-6.5	4-6	fully opened
