# Supplementary material for: Integrated Metabolome and Transcriptome Analysis Uncovers the Role of Anthocyanin Metabolism in Michelia maudiae
Source: Int J Genomics. 2019 Nov 3;2019:4393905. doi: 10.1155/2019/4393905 (PMC6874964; doi:10.1155/2019/4393905)
Supplement: Supplementary 10 — Table S2: primers used in quantitative real-time PCR. [file 4393905.f10.xlsx]

## Sheet: Sheet1
Table S2 Primers used in quantitative real-time PCR
Gene ID	Primer sequence(forward) 5'-3'	Primer sequence(reverse) 5'-3'
actin	AATGGTTAAGGCTGGATTTGC	GGCTTCAGTAAGGAGAACGG
Unigene973_4CL	CGGAGGACGCTGTTAAAGAA	ATTGGAGGCGATTGATGACC
Unigene16058_ANS	AGAATGGCCACACAAGTAGC	CCTCGTTCTCCCATTCCAAG
Unigene16496_DFR	GAGGAGAGATGAAGGGACCA	TAACCGATGTGGCCTTCTTG
Unigene28164_ANR	GCTGTTGGCAAAATGAGGAC	GCTCCATGGGTTGATTCGAT
Unigene28820_C4H	TGGGGCTTACAGAAGTGGTA	CTTAGCGTCGTTCAGGTTCA
Unigene35278_PAL	ACAGCATTGGAAGCACTGAA	TCCTGTTTCGGCTTCGTTAG
Unigene35471_CHS	ACTCAAGGAGAATCCCGACA	AGTGCCTGACCTACAAGACT
Unigene49321_CHS	GCCGTTGGGTATTTCTGACT	CTCAAGACCTTCACCAGTCG
Unigene56358_FLS	TGTCCCGACCATCGATCTTA	CTAGCGAAAGGCTACTCAGC
