# Supplementary material for: Integrated Metabolome and Transcriptome Analysis Uncovers the Role of Anthocyanin Metabolism in Michelia maudiae
Source: Int J Genomics. 2019 Nov 3;2019:4393905. doi: 10.1155/2019/4393905 (PMC6874964; doi:10.1155/2019/4393905)
Supplement: Supplementary 11 — Table S3: summary of RNA-seq results. [file 4393905.f11.xlsx]

## Sheet: Sheet1
Table S3 Summary of RNA-Seq results.
Sample Name	WE	WL	RE	RL
Raw reads	43015954	39238494	38941962	45884938
Clean reads	42791460	39038416	38735966	45621702
Clean reads ratio(%)	99.48	99.49	99.47	99.43
Adatper reads	219178	195072	200846	253440
Low quality reads	5316	5006	5150	9796
Q20(%)	97	96.91	97.12	96.97
Q30(%)	93.38	93.25	93.62	93.47
GC content(%)	47.08	46.8	46.76	46.81
