# Supplementary material for: Integrated Metabolome and Transcriptome Analysis Uncovers the Role of Anthocyanin Metabolism in Michelia maudiae
Source: Int J Genomics. 2019 Nov 3;2019:4393905. doi: 10.1155/2019/4393905 (PMC6874964; doi:10.1155/2019/4393905)
Supplement: Supplementary 12 — Table S4: number of differentially expressed transcription factors in comparison groups. [file 4393905.f12.xlsx]

## Sheet: AllSample.TFpred_diff
GeneID	TFfamily	log2Fold	qvalue	Diff
Unigene10167_All	AP2	-8.05049	5.45725e-122	WE-vs-WL
Unigene48766_All	AP2	-6.36288	3.55758e-85	WE-vs-WL
Unigene43742_All	AP2	-2.71125	5.34578e-43	WE-vs-WL
Unigene67634_All	AP2	-1.09813	2.85861e-19	WE-vs-WL
Unigene41596_All	AP2	1.84962	1.15866e-09	WE-vs-WL
Unigene96629_All	AP2	-6.05301	3.0118e-09	WE-vs-WL
Unigene70828_All	AP2	3.26466	1.63675e-06	WE-vs-WL
Unigene96310_All	AP2	-4.0452	8.22539e-05	WE-vs-WL
Unigene13351_All	AP2	-4.81597	0.000209156	WE-vs-WL
Unigene11647_All	AP2	-3.0452	0.000469601	WE-vs-WL
Unigene27944_All	AP2	-1.90527	0.000808533	WE-vs-WL
Unigene10267_All	AP2	-1.07321	0.0026924	WE-vs-WL
Unigene11647_All	AP2	1.11543	2.176e-257	RE-vs-RL
Unigene48766_All	AP2	-5.26773	6.18346e-132	RE-vs-RL
Unigene43742_All	AP2	-3.74561	3.89866e-79	RE-vs-RL
Unigene39759_All	AP2	-2.03854	1.01125e-52	RE-vs-RL
Unigene67634_All	AP2	-1.72816	1.24514e-50	RE-vs-RL
Unigene41597_All	AP2	-2.12586	3.48454e-47	RE-vs-RL
Unigene10167_All	AP2	-8.67344	1.2417e-40	RE-vs-RL
Unigene13351_All	AP2	-6.56709	7.08041e-24	RE-vs-RL
Unigene75930_All	AP2	2.45177	6.08576e-19	RE-vs-RL
Unigene86050_All	AP2	-6.31475	2.3806e-10	RE-vs-RL
Unigene56903_All	AP2	2.6997	8.59169e-05	RE-vs-RL
Unigene59711_All	AP2	-2.37069	0.000155915	RE-vs-RL
Unigene96629_All	AP2	-4.68248	0.000597832	RE-vs-RL
Unigene11647_All	AP2	7.01269	0	WE-vs-RE
Unigene27330_All	AP2	5.7074	3.86346e-160	WE-vs-RE
Unigene39759_All	AP2	7.62722	1.56615e-101	WE-vs-RE
Unigene53185_All	AP2	9.9177	8.84251e-84	WE-vs-RE
Unigene10167_All	AP2	-1.71107	2.3635e-55	WE-vs-RE
Unigene1548_All	AP2	8.3504	3.5719e-35	WE-vs-RE
Unigene13351_All	AP2	2.52823	2.48552e-14	WE-vs-RE
Unigene40113_All	AP2	1.65376	2.92582e-11	WE-vs-RE
Unigene86050_All	AP2	6.20656	4.43867e-10	WE-vs-RE
Unigene10267_All	AP2	-2.46171	2.25194e-09	WE-vs-RE
Unigene75930_All	AP2	4.31673	3.17784e-06	WE-vs-RE
Unigene59711_All	AP2	2.87616	3.09003e-05	WE-vs-RE
Unigene41596_All	AP2	-2.19423	0.000204317	WE-vs-RE
Unigene96629_All	AP2	-1.65367	0.000320491	WE-vs-RE
Unigene96310_All	AP2	-2.4337	0.000946751	WE-vs-RE
Unigene11647_All	AP2	11.1733	0	WL-vs-RL
Unigene27330_All	AP2	6.015	2.128e-192	WL-vs-RL
Unigene41597_All	AP2	-2.39294	1.78111e-59	WL-vs-RL
Unigene53185_All	AP2	9.0439	2.6761e-55	WL-vs-RL
Unigene1548_All	AP2	8.81603	1.07683e-48	WL-vs-RL
Unigene75930_All	AP2	7.77711	5.95017e-27	WL-vs-RL
Unigene39759_All	AP2	7.59729	2.78134e-24	WL-vs-RL
Unigene41596_All	AP2	-3.34415	9.80654e-19	WL-vs-RL
Unigene27944_All	AP2	2.94125	3.79689e-11	WL-vs-RL
Unigene72796_All	AP2	-1.03156	2.19356e-09	WL-vs-RL
Unigene70828_All	AP2	-3.08112	1.46851e-06	WL-vs-RL
Unigene56903_All	AP2	5.36208	2.0409e-06	WL-vs-RL
Unigene10267_All	AP2	-3.27376	4.88492e-06	WL-vs-RL
Unigene40113_All	AP2	1.22631	6.61056e-06	WL-vs-RL
Unigene36053_All	AP2	4.09904	0.00460202	WL-vs-RL
Unigene41246_All	bHLH	2.18144	1.16124e-155	WE-vs-WL
Unigene56865_All	bHLH	1.32654	3.67319e-143	WE-vs-WL
Unigene56781_All	bHLH	-1.8702	7.5573e-120	WE-vs-WL
Unigene56896_All	bHLH	1.29444	5.01846e-100	WE-vs-WL
Unigene22477_All	bHLH	3.11265	3.79795e-96	WE-vs-WL
Unigene35006_All	bHLH	-3.71424	1.62984e-95	WE-vs-WL
Unigene50744_All	bHLH	2.80457	2.13062e-92	WE-vs-WL
Unigene69441_All	bHLH	-6.42941	5.90771e-89	WE-vs-WL
Unigene62721_All	bHLH	-2.06296	9.48963e-77	WE-vs-WL
Unigene92378_All	bHLH	4.81645	2.34784e-76	WE-vs-WL
Unigene80401_All	bHLH	-8.41717	4.87178e-76	WE-vs-WL
Unigene22823_All	bHLH	1.08115	1.91823e-75	WE-vs-WL
Unigene14314_All	bHLH	-3.4052	2.41921e-72	WE-vs-WL
Unigene42308_All	bHLH	-4.48612	6.02457e-72	WE-vs-WL
Unigene92596_All	bHLH	1.52402	1.05515e-68	WE-vs-WL
Unigene5506_All	bHLH	-2.43022	7.97732e-64	WE-vs-WL
Unigene74814_All	bHLH	-1.57705	2.88263e-62	WE-vs-WL
Unigene22172_All	bHLH	1.73643	1.07499e-60	WE-vs-WL
Unigene47742_All	bHLH	-1.09409	4.27969e-58	WE-vs-WL
Unigene28120_All	bHLH	-2.53505	8.10605e-57	WE-vs-WL
Unigene28369_All	bHLH	-1.88319	3.24246e-55	WE-vs-WL
Unigene56765_All	bHLH	1.25092	1.27023e-53	WE-vs-WL
Unigene9909_All	bHLH	-1.39974	2.7436e-49	WE-vs-WL
Unigene77501_All	bHLH	4.64218	6.7284e-49	WE-vs-WL
Unigene10054_All	bHLH	-1.8534	3.88132e-33	WE-vs-WL
Unigene93619_All	bHLH	-5.95774	4.99409e-33	WE-vs-WL
Unigene68198_All	bHLH	-1.19158	1.30687e-29	WE-vs-WL
Unigene36200_All	bHLH	-1.67534	7.84678e-27	WE-vs-WL
Unigene93933_All	bHLH	1.11211	1.83593e-26	WE-vs-WL
Unigene54695_All	bHLH	-2.4123	9.75431e-22	WE-vs-WL
Unigene41245_All	bHLH	2.96826	1.5392e-21	WE-vs-WL
Unigene49540_All	bHLH	-4.22452	1.17232e-18	WE-vs-WL
Unigene55012_All	bHLH	-2.091	5.25482e-17	WE-vs-WL
Unigene20733_All	bHLH	1.18563	8.76279e-17	WE-vs-WL
Unigene35384_All	bHLH	-2.57071	1.14907e-16	WE-vs-WL
Unigene10816_All	bHLH	-1.98921	2.45089e-16	WE-vs-WL
Unigene22327_All	bHLH	-3.09159	2.27796e-15	WE-vs-WL
Unigene71142_All	bHLH	1.13673	3.69736e-15	WE-vs-WL
Unigene41244_All	bHLH	1.99646	3.72401e-15	WE-vs-WL
Unigene42307_All	bHLH	-6.84151	7.66406e-15	WE-vs-WL
Unigene42306_All	bHLH	-6.81597	1.28385e-14	WE-vs-WL
Unigene48906_All	bHLH	-2.29402	2.46289e-14	WE-vs-WL
Unigene43623_All	bHLH	1.61795	2.99175e-14	WE-vs-WL
Unigene43800_All	bHLH	5.68612	6.86602e-14	WE-vs-WL
Unigene69338_All	bHLH	-1.40943	1.3523e-13	WE-vs-WL
Unigene56988_All	bHLH	-6.40093	2.11177e-11	WE-vs-WL
Unigene36555_All	bHLH	-5.31529	3.3581e-11	WE-vs-WL
Unigene36159_All	bHLH	-1.88665	3.4974e-11	WE-vs-WL
Unigene54698_All	bHLH	-2.04115	3.71611e-11	WE-vs-WL
Unigene47744_All	bHLH	2.47967	1.10667e-10	WE-vs-WL
Unigene28367_All	bHLH	-1.48825	1.49459e-10	WE-vs-WL
Unigene55011_All	bHLH	-3.25052	2.52159e-10	WE-vs-WL
Unigene77808_All	bHLH	-2.4525	7.3864e-10	WE-vs-WL
Unigene77398_All	bHLH	-1.99726	4.12709e-05	WE-vs-WL
Unigene80148_All	bHLH	-5.00862	6.15368e-05	WE-vs-WL
Unigene55016_All	bHLH	-2.4813	0.00024586	WE-vs-WL
Unigene62314_All	bHLH	1.36419	0.000252469	WE-vs-WL
Unigene54697_All	bHLH	-4.70906	0.000387643	WE-vs-WL
Unigene30445_All	bHLH	-3.76509	0.000536179	WE-vs-WL
Unigene75011_All	bHLH	-1.42722	0.0017355	WE-vs-WL
Unigene54694_All	bHLH	4.54776	0.00189193	WE-vs-WL
Unigene1838_All	bHLH	-4.17854	0.00474037	WE-vs-WL
Unigene55013_All	bHLH	4.22583	0.00689973	WE-vs-WL
Unigene30726_All	bHLH	3.21219	0.00965773	WE-vs-WL
Unigene56865_All	bHLH	2.28582	0	RE-vs-RL
Unigene16093_All	bHLH	-1.57087	0	RE-vs-RL
Unigene42308_All	bHLH	-8.21319	0	RE-vs-RL
Unigene28120_All	bHLH	-4.86254	0	RE-vs-RL
Unigene14314_All	bHLH	-4.811	0	RE-vs-RL
Unigene74814_All	bHLH	-3.77986	0	RE-vs-RL
Unigene93933_All	bHLH	1.78084	1.819e-286	RE-vs-RL
Unigene68198_All	bHLH	-4.59998	2.63193e-278	RE-vs-RL
Unigene6483_All	bHLH	2.61348	3.63839e-237	RE-vs-RL
Unigene63549_All	bHLH	2.84302	4.42878e-221	RE-vs-RL
Unigene22477_All	bHLH	3.9506	2.66899e-210	RE-vs-RL
Unigene50744_All	bHLH	4.07333	1.96962e-169	RE-vs-RL
Unigene69519_All	bHLH	-1.87155	1.1915e-167	RE-vs-RL
Unigene56781_All	bHLH	-3.00074	1.24096e-147	RE-vs-RL
Unigene10564_All	bHLH	5.45216	1.14852e-145	RE-vs-RL
Unigene69441_All	bHLH	-5.77603	4.18135e-135	RE-vs-RL
Unigene43800_All	bHLH	6.40291	4.35776e-127	RE-vs-RL
Unigene56896_All	bHLH	1.64228	1.88941e-121	RE-vs-RL
Unigene42307_All	bHLH	-7.41924	2.54964e-118	RE-vs-RL
Unigene41246_All	bHLH	2.60564	3.978e-114	RE-vs-RL
Unigene35215_All	bHLH	-1.23138	1.74967e-106	RE-vs-RL
Unigene47742_All	bHLH	-1.87997	1.60164e-101	RE-vs-RL
Unigene56765_All	bHLH	1.43389	5.14539e-95	RE-vs-RL
Unigene22823_All	bHLH	1.00141	2.6544e-88	RE-vs-RL
Unigene5506_All	bHLH	-3.47962	1.12669e-75	RE-vs-RL
Unigene53793_All	bHLH	-2.17379	4.72141e-74	RE-vs-RL
Unigene77808_All	bHLH	-6.12685	3.53618e-69	RE-vs-RL
Unigene43623_All	bHLH	5.48106	3.81379e-68	RE-vs-RL
Unigene28369_All	bHLH	-1.64822	3.17259e-64	RE-vs-RL
Unigene77501_All	bHLH	3.17177	1.27344e-63	RE-vs-RL
Unigene62721_All	bHLH	-1.89976	1.7336e-63	RE-vs-RL
Unigene56988_All	bHLH	-6.3003	1.96564e-58	RE-vs-RL
Unigene22327_All	bHLH	-5.07791	5.43439e-58	RE-vs-RL
Unigene36200_All	bHLH	-4.40311	2.67184e-54	RE-vs-RL
Unigene55012_All	bHLH	-1.58834	3.01681e-54	RE-vs-RL
Unigene92596_All	bHLH	1.495	1.0051e-52	RE-vs-RL
Unigene36159_All	bHLH	-3.50621	1.52291e-50	RE-vs-RL
Unigene42306_All	bHLH	-9.04004	7.28045e-50	RE-vs-RL
Unigene54696_All	bHLH	3.45459	1.33887e-48	RE-vs-RL
Unigene1838_All	bHLH	-4.90516	5.86401e-44	RE-vs-RL
Unigene68449_All	bHLH	-2.02793	5.47183e-43	RE-vs-RL
Unigene15971_All	bHLH	4.03955	1.88115e-36	RE-vs-RL
Unigene60927_All	bHLH	5.80822	7.90503e-35	RE-vs-RL
Unigene41245_All	bHLH	2.42216	7.57745e-33	RE-vs-RL
Unigene49540_All	bHLH	-5.79215	3.4582e-28	RE-vs-RL
Unigene41349_All	bHLH	-1.5716	6.88088e-28	RE-vs-RL
Unigene10816_All	bHLH	1.92814	8.41054e-26	RE-vs-RL
Unigene41348_All	bHLH	-1.49824	1.89035e-25	RE-vs-RL
Unigene68448_All	bHLH	-1.62877	2.29061e-23	RE-vs-RL
Unigene35155_All	bHLH	-1.24783	3.8343e-21	RE-vs-RL
Unigene20732_All	bHLH	1.27649	4.35851e-21	RE-vs-RL
Unigene71142_All	bHLH	1.2514	5.54804e-20	RE-vs-RL
Unigene63585_All	bHLH	-3.55904	1.30525e-17	RE-vs-RL
Unigene69355_All	bHLH	-1.34897	3.62334e-17	RE-vs-RL
Unigene54695_All	bHLH	-2.04573	8.81298e-17	RE-vs-RL
Unigene69954_All	bHLH	-1.27477	9.93685e-17	RE-vs-RL
Unigene30726_All	bHLH	5.63044	5.30125e-16	RE-vs-RL
Unigene49006_All	bHLH	-1.42657	6.12153e-16	RE-vs-RL
Unigene35384_All	bHLH	-2.38372	6.94794e-16	RE-vs-RL
Unigene20734_All	bHLH	6.84144	3.87912e-14	RE-vs-RL
Unigene80401_All	bHLH	-5.72657	4.838e-14	RE-vs-RL
Unigene69347_All	bHLH	-2.58041	1.8279e-13	RE-vs-RL
Unigene15970_All	bHLH	6.7325	2.94407e-13	RE-vs-RL
Unigene69338_All	bHLH	-1.82923	4.50243e-13	RE-vs-RL
Unigene10054_All	bHLH	-2.53734	7.06509e-13	RE-vs-RL
Unigene74566_All	bHLH	2.6737	1.54893e-09	RE-vs-RL
Unigene85767_All	bHLH	6.14754	2.26621e-09	RE-vs-RL
Unigene24539_All	bHLH	-4.10766	1.08361e-08	RE-vs-RL
Unigene75011_All	bHLH	-4.10766	1.08361e-08	RE-vs-RL
Unigene53798_All	bHLH	-1.73771	2.86435e-08	RE-vs-RL
Unigene20733_All	bHLH	1.02163	3.04742e-08	RE-vs-RL
Unigene86041_All	bHLH	-2.50975	1.30571e-07	RE-vs-RL
Unigene36555_All	bHLH	-2.88526	3.19083e-07	RE-vs-RL
Unigene63251_All	bHLH	-3.69262	2.12134e-06	RE-vs-RL
Unigene93619_All	bHLH	-1.17782	6.05202e-06	RE-vs-RL
Unigene17492_All	bHLH	-4.20719	3.3747e-05	RE-vs-RL
Unigene95320_All	bHLH	-5.061	6.41639e-05	RE-vs-RL
Unigene10396_All	bHLH	-1.20077	0.000126272	RE-vs-RL
Unigene49541_All	bHLH	2.40014	0.000132694	RE-vs-RL
Unigene92378_All	bHLH	1.57417	0.000171038	RE-vs-RL
Unigene77398_All	bHLH	-1.67881	0.000854517	RE-vs-RL
Unigene41244_All	bHLH	2.15913	0.00109278	RE-vs-RL
Unigene80148_All	bHLH	-3.47023	0.00316527	RE-vs-RL
Unigene62314_All	bHLH	-1.16703	0.00631194	RE-vs-RL
Unigene72439_All	bHLH	-3.3003	0.00673302	RE-vs-RL
Unigene55011_All	bHLH	-1.00074	0.00687519	RE-vs-RL
Unigene55014_All	bHLH	4.06008	0.00859142	RE-vs-RL
Unigene16093_All	bHLH	1.74101	0	WE-vs-RE
Unigene42308_All	bHLH	2.33783	1.58642e-227	WE-vs-RE
Unigene9769_All	bHLH	5.85492	2.94842e-177	WE-vs-RE
Unigene35215_All	bHLH	1.60395	1.39804e-152	WE-vs-RE
Unigene6259_All	bHLH	-5.74712	2.15439e-141	WE-vs-RE
Unigene47743_All	bHLH	-1.65039	3.7149e-138	WE-vs-RE
Unigene14314_All	bHLH	1.70236	1.19648e-116	WE-vs-RE
Unigene28120_All	bHLH	1.66142	1.9953e-114	WE-vs-RE
Unigene20866_All	bHLH	-1.79923	2.55508e-112	WE-vs-RE
Unigene35006_All	bHLH	-3.33978	4.43151e-97	WE-vs-RE
Unigene47744_All	bHLH	4.71266	6.99853e-85	WE-vs-RE
Unigene42307_All	bHLH	2.93981	7.10705e-85	WE-vs-RE
Unigene55012_All	bHLH	2.07673	4.64392e-75	WE-vs-RE
Unigene93933_All	bHLH	1.59535	1.49628e-69	WE-vs-RE
Unigene80401_All	bHLH	-2.96437	4.45519e-69	WE-vs-RE
Unigene63549_All	bHLH	-1.79441	8.33632e-60	WE-vs-RE
Unigene68448_All	bHLH	4.04935	1.85978e-58	WE-vs-RE
Unigene10564_All	bHLH	-4.01093	7.19646e-47	WE-vs-RE
Unigene10054_All	bHLH	-2.20873	1.07659e-45	WE-vs-RE
Unigene1838_All	bHLH	4.0887	3.17642e-39	WE-vs-RE
Unigene95320_All	bHLH	-3.6058	4.24402e-39	WE-vs-RE
Unigene28833_All	bHLH	1.47117	9.15426e-33	WE-vs-RE
Unigene56988_All	bHLH	2.26145	5.27787e-30	WE-vs-RE
Unigene77808_All	bHLH	1.94115	3.10019e-29	WE-vs-RE
Unigene53793_All	bHLH	1.10751	1.50401e-27	WE-vs-RE
Unigene42306_All	bHLH	1.94093	1.64951e-26	WE-vs-RE
Unigene8389_All	bHLH	1.48384	3.17971e-26	WE-vs-RE
Unigene41349_All	bHLH	1.48384	7.20397e-25	WE-vs-RE
Unigene49005_All	bHLH	6.21855	1.27893e-21	WE-vs-RE
Unigene41246_All	bHLH	-1.37102	8.54175e-21	WE-vs-RE
Unigene54694_All	bHLH	7.11035	3.36986e-17	WE-vs-RE
Unigene22327_All	bHLH	1.34998	3.01128e-15	WE-vs-RE
Unigene74566_All	bHLH	-3.05458	2.9367e-13	WE-vs-RE
Unigene10396_All	bHLH	-1.41847	5.34542e-13	WE-vs-RE
Unigene43623_All	bHLH	-3.30971	3.05909e-12	WE-vs-RE
Unigene36159_All	bHLH	1.10478	5.16341e-12	WE-vs-RE
Unigene86041_All	bHLH	6.46182	9.9121e-12	WE-vs-RE
Unigene20734_All	bHLH	-6.50103	3.20019e-11	WE-vs-RE
Unigene10816_All	bHLH	-1.37772	3.49362e-11	WE-vs-RE
Unigene55013_All	bHLH	6.33983	6.52956e-11	WE-vs-RE
Unigene22172_All	bHLH	-1.04668	2.94566e-10	WE-vs-RE
Unigene54698_All	bHLH	-1.65205	1.52937e-09	WE-vs-RE
Unigene63585_All	bHLH	-1.10352	7.85623e-09	WE-vs-RE
Unigene41244_All	bHLH	-2.9312	3.10236e-07	WE-vs-RE
Unigene53798_All	bHLH	-1.00686	3.87211e-07	WE-vs-RE
Unigene15971_All	bHLH	-2.28875	4.34711e-07	WE-vs-RE
Unigene60927_All	bHLH	-3.32352	1.29624e-05	WE-vs-RE
Unigene77501_All	bHLH	2.023	3.68784e-05	WE-vs-RE
Unigene50744_All	bHLH	-1.02553	0.000111888	WE-vs-RE
Unigene54697_All	bHLH	-4.99202	0.000125316	WE-vs-RE
Unigene54696_All	bHLH	2.65376	0.000236323	WE-vs-RE
Unigene41245_All	bHLH	1.29119	0.00173234	WE-vs-RE
Unigene24539_All	bHLH	1.41672	0.00269044	WE-vs-RE
Unigene55016_All	bHLH	-1.45476	0.0070411	WE-vs-RE
Unigene93933_All	bHLH	2.26407	0	WL-vs-RL
Unigene6483_All	bHLH	2.64693	4.02588e-219	WL-vs-RL
Unigene9769_All	bHLH	6.46995	2.0384e-142	WL-vs-RL
Unigene6259_All	bHLH	-7.40305	4.43368e-142	WL-vs-RL
Unigene47743_All	bHLH	-1.74478	9.46103e-138	WL-vs-RL
Unigene22172_All	bHLH	-3.23541	1.015e-129	WL-vs-RL
Unigene43800_All	bHLH	3.10752	8.54729e-86	WL-vs-RL
Unigene47744_All	bHLH	2.71509	1.83444e-74	WL-vs-RL
Unigene92378_All	bHLH	-3.04795	3.35445e-59	WL-vs-RL
Unigene20866_All	bHLH	-1.42554	8.80511e-54	WL-vs-RL
Unigene8389_All	bHLH	1.77156	5.80321e-50	WL-vs-RL
Unigene54696_All	bHLH	8.70193	1.12932e-45	WL-vs-RL
Unigene95320_All	bHLH	-8.92648	9.06718e-43	WL-vs-RL
Unigene49006_All	bHLH	-2.18768	1.63962e-42	WL-vs-RL
Unigene47742_All	bHLH	-1.33583	2.28778e-39	WL-vs-RL
Unigene68198_All	bHLH	-2.52324	4.40928e-38	WL-vs-RL
Unigene28833_All	bHLH	1.74381	4.96453e-35	WL-vs-RL
Unigene56781_All	bHLH	-1.82197	8.14608e-34	WL-vs-RL
Unigene10816_All	bHLH	2.53964	1.03567e-32	WL-vs-RL
Unigene7193_All	bHLH	1.01959	1.08515e-32	WL-vs-RL
Unigene55012_All	bHLH	2.57939	3.03251e-31	WL-vs-RL
Unigene68449_All	bHLH	-1.82207	8.22314e-30	WL-vs-RL
Unigene20732_All	bHLH	1.6621	3.92396e-28	WL-vs-RL
Unigene63585_All	bHLH	-4.06632	1.5661e-24	WL-vs-RL
Unigene41348_All	bHLH	-1.52361	2.87192e-24	WL-vs-RL
Unigene41244_All	bHLH	-2.76853	7.11387e-23	WL-vs-RL
Unigene15971_All	bHLH	2.3112	2.55728e-20	WL-vs-RL
Unigene74814_All	bHLH	-1.45241	4.29777e-20	WL-vs-RL
Unigene36200_All	bHLH	-3.30619	8.23115e-20	WL-vs-RL
Unigene10054_All	bHLH	-2.89267	6.70803e-17	WL-vs-RL
Unigene49005_All	bHLH	3.74416	1.87544e-16	WL-vs-RL
Unigene69355_All	bHLH	-1.34953	8.86931e-16	WL-vs-RL
Unigene60927_All	bHLH	1.92787	4.07299e-14	WL-vs-RL
Unigene10396_All	bHLH	-2.05338	7.38632e-14	WL-vs-RL
Unigene61672_All	bHLH	-1.44595	3.12895e-13	WL-vs-RL
Unigene15970_All	bHLH	6.44954	2.45755e-12	WL-vs-RL
Unigene93619_All	bHLH	4.1525	8.33912e-10	WL-vs-RL
Unigene68448_All	bHLH	1.93774	1.85701e-09	WL-vs-RL
Unigene30726_All	bHLH	2.48705	5.47387e-09	WL-vs-RL
Unigene53798_All	bHLH	-1.85873	6.45655e-09	WL-vs-RL
Unigene85767_All	bHLH	5.86458	1.10375e-08	WL-vs-RL
Unigene5506_All	bHLH	-1.50823	1.48617e-07	WL-vs-RL
Unigene62314_All	bHLH	-1.83016	2.08931e-06	WL-vs-RL
Unigene55013_All	bHLH	2.18567	5.77356e-06	WL-vs-RL
Unigene69338_All	bHLH	-1.23194	4.11986e-05	WL-vs-RL
Unigene28367_All	bHLH	1.01574	4.94878e-05	WL-vs-RL
Unigene54694_All	bHLH	1.65223	0.000575096	WL-vs-RL
Unigene75011_All	bHLH	-2.9742	0.001608	WL-vs-RL
Unigene55011_All	bHLH	1.98927	0.0020226	WL-vs-RL
Unigene57107_All	bHLH	4.09904	0.00460202	WL-vs-RL
Unigene49541_All	bHLH	1.61932	0.00557739	WL-vs-RL
Unigene42943_All	ERF	1.68681	0	WE-vs-WL
Unigene42020_All	ERF	2.19588	0	WE-vs-WL
Unigene29420_All	ERF	4.17734	0	WE-vs-WL
Unigene77637_All	ERF	-7.80948	0	WE-vs-WL
Unigene63781_All	ERF	-4.6474	2.75681e-193	WE-vs-WL
Unigene55268_All	ERF	-3.15498	1.916e-159	WE-vs-WL
Unigene49048_All	ERF	-1.18967	1.81458e-114	WE-vs-WL
Unigene7520_All	ERF	-2.82563	4.56156e-74	WE-vs-WL
Unigene43427_All	ERF	1.66659	2.42067e-67	WE-vs-WL
Unigene16001_All	ERF	1.66234	6.7764e-64	WE-vs-WL
Unigene16176_All	ERF	1.33482	6.51428e-62	WE-vs-WL
Unigene64071_All	ERF	4.4173	3.37069e-61	WE-vs-WL
Unigene55269_All	ERF	3.94915	2.6838e-45	WE-vs-WL
Unigene42019_All	ERF	1.37592	3.18044e-34	WE-vs-WL
Unigene2759_All	ERF	1.2458	2.68603e-27	WE-vs-WL
Unigene6748_All	ERF	5.55006	1.98877e-24	WE-vs-WL
Unigene69877_All	ERF	-2.41264	2.7728e-23	WE-vs-WL
Unigene3173_All	ERF	-1.37133	1.24796e-22	WE-vs-WL
Unigene22242_All	ERF	-3.44602	3.48898e-21	WE-vs-WL
Unigene42989_All	ERF	1.97638	4.70724e-13	WE-vs-WL
Unigene62970_All	ERF	-1.27163	2.37122e-11	WE-vs-WL
Unigene42605_All	ERF	-1.55467	1.7606e-10	WE-vs-WL
Unigene70673_All	ERF	6.31329	1.07322e-09	WE-vs-WL
Unigene9792_All	ERF	-6.09608	1.72318e-09	WE-vs-WL
Unigene55267_All	ERF	5.81079	3.40637e-07	WE-vs-WL
Unigene16852_All	ERF	-1.63581	2.1004e-06	WE-vs-WL
Unigene77333_All	ERF	-1.90115	3.34334e-06	WE-vs-WL
Unigene96543_All	ERF	-3.35005	4.15754e-05	WE-vs-WL
Unigene38389_All	ERF	-4.12766	4.39956e-05	WE-vs-WL
Unigene9956_All	ERF	-2.27966	6.1562e-05	WE-vs-WL
Unigene36462_All	ERF	-3.95774	0.000153853	WE-vs-WL
Unigene8046_All	ERF	-1.70776	0.000252878	WE-vs-WL
Unigene24421_All	ERF	1.43458	0.000515639	WE-vs-WL
Unigene43519_All	ERF	-2.5427	0.00883115	WE-vs-WL
Unigene42943_All	ERF	-3.35544	0	RE-vs-RL
Unigene42020_All	ERF	2.83058	0	RE-vs-RL
Unigene49048_All	ERF	-5.09567	0	RE-vs-RL
Unigene63781_All	ERF	-7.55081	0	RE-vs-RL
Unigene77637_All	ERF	-8.90393	0	RE-vs-RL
Unigene16001_All	ERF	2.96428	0	RE-vs-RL
Unigene16176_All	ERF	-2.31454	0	RE-vs-RL
Unigene3173_All	ERF	-4.466	2.81244e-291	RE-vs-RL
Unigene16531_All	ERF	-6.2811	1.25135e-246	RE-vs-RL
Unigene61905_All	ERF	-2.22611	2.30976e-230	RE-vs-RL
Unigene6748_All	ERF	6.72365	1.48118e-218	RE-vs-RL
Unigene3705_All	ERF	-1.6773	7.75953e-202	RE-vs-RL
Unigene43427_All	ERF	1.5395	1.05138e-170	RE-vs-RL
Unigene29420_All	ERF	2.95777	3.64364e-159	RE-vs-RL
Unigene42019_All	ERF	1.92044	3.46909e-151	RE-vs-RL
Unigene61904_All	ERF	-1.12293	4.44196e-142	RE-vs-RL
Unigene43519_All	ERF	-6.513	4.4754e-133	RE-vs-RL
Unigene40983_All	ERF	1.3351	4.19113e-102	RE-vs-RL
Unigene55268_All	ERF	-4.77711	2.44718e-98	RE-vs-RL
Unigene69877_All	ERF	-7.20719	1.3634e-69	RE-vs-RL
Unigene64071_All	ERF	4.97449	5.79402e-66	RE-vs-RL
Unigene34660_All	ERF	1.14575	7.15614e-59	RE-vs-RL
Unigene9792_All	ERF	4.37213	1.4227e-47	RE-vs-RL
Unigene16852_All	ERF	-7.38776	2.10077e-39	RE-vs-RL
Unigene9956_All	ERF	3.18966	5.4782e-36	RE-vs-RL
Unigene55269_All	ERF	5.79773	1.38508e-34	RE-vs-RL
Unigene16492_All	ERF	2.23273	6.40479e-25	RE-vs-RL
Unigene57433_All	ERF	2.66548	3.1801e-20	RE-vs-RL
Unigene57989_All	ERF	7.34548	5.33599e-19	RE-vs-RL
Unigene2759_All	ERF	-1.04558	7.73051e-16	RE-vs-RL
Unigene76874_All	ERF	-3.6508	6.56096e-14	RE-vs-RL
Unigene8046_All	ERF	-1.88526	2.51263e-13	RE-vs-RL
Unigene79307_All	ERF	-5.75287	2.08053e-07	RE-vs-RL
Unigene22242_All	ERF	-1.58041	5.34443e-06	RE-vs-RL
Unigene55267_All	ERF	3.34356	7.77677e-06	RE-vs-RL
Unigene65944_All	ERF	-4.3003	1.58097e-05	RE-vs-RL
Unigene77333_All	ERF	-1.35919	0.00571232	RE-vs-RL
Unigene37131_All	ERF	-3.3003	0.00673302	RE-vs-RL
Unigene62970_All	ERF	1.86962	0.00795038	RE-vs-RL
Unigene42943_All	ERF	2.84324	0	WE-vs-RE
Unigene3705_All	ERF	2.56652	0	WE-vs-RE
Unigene16176_All	ERF	2.39073	0	WE-vs-RE
Unigene11386_All	ERF	-4.21968	9.48606e-239	WE-vs-RE
Unigene16531_All	ERF	6.94268	6.18178e-231	WE-vs-RE
Unigene43519_All	ERF	5.2815	2.887e-129	WE-vs-RE
Unigene3173_All	ERF	1.68801	1.15154e-105	WE-vs-RE
Unigene63781_All	ERF	1.13489	7.65588e-95	WE-vs-RE
Unigene61905_All	ERF	1.01489	5.96891e-71	WE-vs-RE
Unigene40983_All	ERF	1.92982	1.03471e-66	WE-vs-RE
Unigene55268_All	ERF	-1.2839	1.95838e-56	WE-vs-RE
Unigene43427_All	ERF	1.45053	1.39523e-52	WE-vs-RE
Unigene62970_All	ERF	-5.41502	1.89714e-50	WE-vs-RE
Unigene75874_All	ERF	-1.49483	1.57094e-39	WE-vs-RE
Unigene7660_All	ERF	1.38255	1.15508e-34	WE-vs-RE
Unigene36717_All	ERF	-1.28989	1.60745e-11	WE-vs-RE
Unigene76874_All	ERF	2.74123	1.12168e-10	WE-vs-RE
Unigene8046_All	ERF	1.4887	1.45482e-09	WE-vs-RE
Unigene16852_All	ERF	1.15626	5.68247e-09	WE-vs-RE
Unigene96543_All	ERF	-5.6839	6.24118e-07	WE-vs-RE
Unigene79307_All	ERF	4.46112	7.41493e-07	WE-vs-RE
Unigene65944_All	ERF	5.25237	1.02106e-05	WE-vs-RE
Unigene9792_All	ERF	-2.01866	2.46063e-05	WE-vs-RE
Unigene42989_All	ERF	1.16834	0.000127496	WE-vs-RE
Unigene38389_All	ERF	-2.51616	0.000507784	WE-vs-RE
Unigene70673_All	ERF	4.5743	0.000748683	WE-vs-RE
Unigene24421_All	ERF	-2.34624	0.00174763	WE-vs-RE
Unigene55269_All	ERF	-2.63164	0.0026563	WE-vs-RE
Unigene16453_All	ERF	-1.7792	0.00582604	WE-vs-RE
Unigene64203_All	ERF	-4.09893	0.0081523	WE-vs-RE
Unigene42943_All	ERF	-2.19901	0	WL-vs-RL
Unigene29420_All	ERF	-1.77003	1.18221e-266	WL-vs-RL
Unigene49048_All	ERF	-3.77108	3.82237e-214	WL-vs-RL
Unigene61904_All	ERF	-1.38079	1.71675e-213	WL-vs-RL
Unigene40983_All	ERF	2.37794	1.50546e-204	WL-vs-RL
Unigene11386_All	ERF	-4.37996	7.36801e-196	WL-vs-RL
Unigene6748_All	ERF	3.04975	1.17195e-146	WL-vs-RL
Unigene43427_All	ERF	1.32344	3.94504e-124	WL-vs-RL
Unigene16001_All	ERF	1.25996	6.83825e-105	WL-vs-RL
Unigene42019_All	ERF	1.28863	1.03702e-77	WL-vs-RL
Unigene34660_All	ERF	1.23893	1.04757e-60	WL-vs-RL
Unigene16176_All	ERF	-1.25863	4.09479e-59	WL-vs-RL
Unigene36717_All	ERF	-2.46506	2.16941e-48	WL-vs-RL
Unigene2759_All	ERF	-1.67203	8.82157e-44	WL-vs-RL
Unigene9956_All	ERF	4.7187	4.497e-42	WL-vs-RL
Unigene9792_All	ERF	8.44954	1.30013e-39	WL-vs-RL
Unigene75874_All	ERF	-1.21426	4.25818e-23	WL-vs-RL
Unigene57433_All	ERF	3.10706	1.93972e-21	WL-vs-RL
Unigene7520_All	ERF	1.72623	1.48972e-20	WL-vs-RL
Unigene55268_All	ERF	-2.90603	2.91135e-18	WL-vs-RL
Unigene57989_All	ERF	7.06252	9.38852e-18	WL-vs-RL
Unigene16492_All	ERF	1.81181	1.16324e-17	WL-vs-RL
Unigene62970_All	ERF	-2.27376	3.11075e-11	WL-vs-RL
Unigene42989_All	ERF	-1.65768	5.21761e-11	WL-vs-RL
Unigene3173_All	ERF	-1.40666	3.41158e-10	WL-vs-RL
Unigene42605_All	ERF	1.41553	6.20553e-09	WL-vs-RL
Unigene69877_All	ERF	-4.13175	3.55527e-08	WL-vs-RL
Unigene70673_All	ERF	-2.55387	1.44011e-06	WL-vs-RL
Unigene16852_All	ERF	-4.59569	3.13863e-06	WL-vs-RL
Unigene24421_All	ERF	-1.96564	5.31232e-06	WL-vs-RL
Unigene16453_All	ERF	-1.63633	0.000240317	WL-vs-RL
Unigene63781_All	ERF	-1.76853	0.000322481	WL-vs-RL
Unigene64203_All	ERF	-2.36123	0.00144467	WL-vs-RL
Unigene76874_All	ERF	-1.95184	0.00663164	WL-vs-RL
Unigene8046_All	ERF	1.3112	0.00787923	WL-vs-RL
Unigene33686_All	HSF	-3.04029	3.98363e-159	WE-vs-WL
Unigene74841_All	HSF	-2.88783	2.04432e-145	WE-vs-WL
Unigene33699_All	HSF	-2.49434	5.42167e-78	WE-vs-WL
Unigene33691_All	HSF	-2.31106	3.75713e-69	WE-vs-WL
Unigene33687_All	HSF	-2.76509	2.28431e-68	WE-vs-WL
Unigene56442_All	HSF	-2.40678	4.64466e-59	WE-vs-WL
Unigene33698_All	HSF	-2.92583	4.73758e-55	WE-vs-WL
Unigene33685_All	HSF	-4.1436	2.54314e-42	WE-vs-WL
Unigene74842_All	HSF	-1.35901	3.95307e-41	WE-vs-WL
Unigene44127_All	HSF	-4.52542	2.23259e-40	WE-vs-WL
Unigene33682_All	HSF	-1.79612	1.18638e-32	WE-vs-WL
Unigene74840_All	HSF	-2.98212	1.79674e-32	WE-vs-WL
Unigene33693_All	HSF	-3.06394	5.8285e-29	WE-vs-WL
Unigene33694_All	HSF	-2.31227	7.36819e-25	WE-vs-WL
Unigene34166_All	HSF	-2.36373	9.37304e-23	WE-vs-WL
Unigene33684_All	HSF	-3.07875	9.21195e-17	WE-vs-WL
Unigene71620_All	HSF	-3.27966	2.42367e-16	WE-vs-WL
Unigene34164_All	HSF	6.51123	6.61293e-11	WE-vs-WL
Unigene33697_All	HSF	-1.30972	7.05637e-07	WE-vs-WL
Unigene48300_All	HSF	-2.5427	1.80185e-05	WE-vs-WL
Unigene62037_All	HSF	-1.02813	0.000184063	WE-vs-WL
Unigene33695_All	HSF	-1.18803	0.000355601	WE-vs-WL
Unigene48299_All	HSF	-1.5427	0.0074024	WE-vs-WL
Unigene33694_All	HSF	-6.31078	4.40243e-290	RE-vs-RL
Unigene28848_All	HSF	-2.14095	9.84908e-270	RE-vs-RL
Unigene33697_All	HSF	-4.62543	9.09843e-261	RE-vs-RL
Unigene33698_All	HSF	-5.4012	1.40253e-227	RE-vs-RL
Unigene28847_All	HSF	-1.51452	1.25154e-224	RE-vs-RL
Unigene33684_All	HSF	-11.791	1.57554e-216	RE-vs-RL
Unigene33699_All	HSF	-3.17641	1.07028e-198	RE-vs-RL
Unigene42657_All	HSF	-3.62737	1.18063e-141	RE-vs-RL
Unigene74842_All	HSF	-4.39247	1.97139e-87	RE-vs-RL
Unigene33685_All	HSF	-8.57643	4.75988e-79	RE-vs-RL
Unigene44127_All	HSF	-7.38245	1.81257e-77	RE-vs-RL
Unigene34165_All	HSF	-2.61832	2.78569e-69	RE-vs-RL
Unigene33693_All	HSF	-9.48984	6.67704e-64	RE-vs-RL
Unigene33686_All	HSF	-6.75973	1.075e-52	RE-vs-RL
Unigene36588_All	HSF	2.26482	6.5642e-47	RE-vs-RL
Unigene34167_All	HSF	-2.91921	1.37366e-45	RE-vs-RL
Unigene71620_All	HSF	-7.09472	5.15431e-33	RE-vs-RL
Unigene74840_All	HSF	-1.68875	8.14473e-26	RE-vs-RL
Unigene56442_All	HSF	-1.37115	1.553e-25	RE-vs-RL
Unigene62037_All	HSF	-3.81487	7.91592e-22	RE-vs-RL
Unigene33695_All	HSF	-2.55406	3.02904e-12	RE-vs-RL
Unigene75743_All	HSF	-1.1483	1.3005e-09	RE-vs-RL
Unigene74841_All	HSF	-2.5857	3.37483e-08	RE-vs-RL
Unigene48301_All	HSF	-2.88526	5.4772e-06	RE-vs-RL
Unigene62038_All	HSF	-3.54823	9.5187e-06	RE-vs-RL
Unigene89231_All	HSF	-4.53048	0.00127489	RE-vs-RL
Unigene48299_All	HSF	-1.18166	0.00321855	RE-vs-RL
Unigene33684_All	HSF	4.05631	0	WE-vs-RE
Unigene28847_All	HSF	2.0782	0	WE-vs-RE
Unigene28848_All	HSF	2.61129	0	WE-vs-RE
Unigene74841_All	HSF	-4.37031	2.60383e-219	WE-vs-RE
Unigene33697_All	HSF	3.28587	5.79689e-202	WE-vs-RE
Unigene33694_All	HSF	2.50236	6.24361e-165	WE-vs-RE
Unigene33691_All	HSF	-7.34342	7.35977e-134	WE-vs-RE
Unigene42657_All	HSF	3.37034	6.20797e-129	WE-vs-RE
Unigene33686_All	HSF	-2.25477	5.64771e-127	WE-vs-RE
Unigene33682_All	HSF	-6.70818	5.52471e-90	WE-vs-RE
Unigene33687_All	HSF	-9.98158	1.51382e-80	WE-vs-RE
Unigene33698_All	HSF	1.33911	6.33494e-56	WE-vs-RE
Unigene34167_All	HSF	1.7726	1.14932e-24	WE-vs-RE
Unigene36588_All	HSF	3.99954	7.57815e-17	WE-vs-RE
Unigene75743_All	HSF	-1.02337	5.57235e-15	WE-vs-RE
Unigene36588_All	HSF	9.27297	8.75481e-63	WL-vs-RL
Unigene74842_All	HSF	-3.99258	1.10598e-57	WL-vs-RL
Unigene75743_All	HSF	-2.26925	8.21169e-46	WL-vs-RL
Unigene33686_All	HSF	-5.9742	4.3333e-29	WL-vs-RL
Unigene74841_All	HSF	-4.06818	6.44497e-28	WL-vs-RL
Unigene33691_All	HSF	-7.97788	4.5411e-25	WL-vs-RL
Unigene33682_All	HSF	-7.85758	2.09789e-23	WL-vs-RL
Unigene34166_All	HSF	2.08613	3.38459e-17	WL-vs-RL
Unigene33687_All	HSF	-7.21666	3.54714e-16	WL-vs-RL
Unigene34164_All	HSF	-6.61942	2.03996e-11	WL-vs-RL
Unigene74840_All	HSF	1.74254	2.05717e-08	WL-vs-RL
Unigene62037_All	HSF	-2.78834	3.51696e-08	WL-vs-RL
Unigene34165_All	HSF	-1.10871	1.03845e-07	WL-vs-RL
Unigene33693_All	HSF	-5.50394	6.22452e-06	WL-vs-RL
Unigene48300_All	HSF	2.21166	0.000317578	WL-vs-RL
Unigene33694_All	HSF	-1.49616	0.000736382	WL-vs-RL
Unigene33684_All	HSF	-4.65595	0.00119722	WL-vs-RL
Unigene33685_All	HSF	-3.59569	0.00274995	WL-vs-RL
Unigene62038_All	HSF	-2.85873	0.0030761	WL-vs-RL
Unigene33698_All	HSF	-1.13626	0.00386244	WL-vs-RL
Unigene41538_All	MYB	3.23471	0	WE-vs-WL
Unigene12476_All	MYB	1.3934	0	WE-vs-WL
Unigene35118_All	MYB	-4.18442	0	WE-vs-WL
Unigene35117_All	MYB	-3.96111	2.44045e-285	WE-vs-WL
Unigene41537_All	MYB	6.04789	6.62516e-200	WE-vs-WL
Unigene3347_All	MYB	1.6397	7.18073e-133	WE-vs-WL
Unigene21366_All	MYB	-1.07276	2.82541e-71	WE-vs-WL
Unigene20746_All	MYB	-3.63487	5.19542e-65	WE-vs-WL
Unigene69647_All	MYB	3.49116	7.96676e-58	WE-vs-WL
Unigene22404_All	MYB	-2.20398	9.83468e-55	WE-vs-WL
Unigene29273_All	MYB	-4.71929	2.31844e-53	WE-vs-WL
Unigene69995_All	MYB	-3.6207	2.20894e-48	WE-vs-WL
Unigene16157_All	MYB	2.1864	4.06369e-40	WE-vs-WL
Unigene14439_All	MYB	-3.40986	4.6952e-40	WE-vs-WL
Unigene96822_All	MYB	-4.01085	5.72744e-38	WE-vs-WL
Unigene61563_All	MYB	1.25936	6.51019e-33	WE-vs-WL
Unigene61562_All	MYB	-1.27832	2.58661e-32	WE-vs-WL
Unigene62902_All	MYB	-2.72641	1.5173e-30	WE-vs-WL
Unigene20744_All	MYB	-2.93863	5.38692e-27	WE-vs-WL
Unigene35116_All	MYB	-3.37277	7.50908e-20	WE-vs-WL
Unigene69094_All	MYB	-1.536	1.50135e-17	WE-vs-WL
Unigene41516_All	MYB	1.57278	8.43948e-14	WE-vs-WL
Unigene16783_All	MYB	-1.2761	9.62028e-13	WE-vs-WL
Unigene61566_All	MYB	1.75167	1.42036e-12	WE-vs-WL
Unigene75794_All	MYB	-1.25052	4.84867e-12	WE-vs-WL
Unigene48479_All	MYB	1.68996	1.49154e-09	WE-vs-WL
Unigene75793_All	MYB	-3.58223	1.25801e-08	WE-vs-WL
Unigene49636_All	MYB	1.51175	1.3994e-06	WE-vs-WL
Unigene77569_All	MYB	-2.86463	4.47637e-06	WE-vs-WL
Unigene71205_All	MYB	-3.01663	1.88771e-05	WE-vs-WL
Unigene8161_All	MYB	5.03319	0.000149298	WE-vs-WL
Unigene68291_All	MYB	-4.70906	0.000387643	WE-vs-WL
Unigene43690_All	MYB	-2.27966	0.00126703	WE-vs-WL
Unigene597_All	MYB	4.54776	0.00189193	WE-vs-WL
Unigene92643_All	MYB	1.01627	0.0027494	WE-vs-WL
Unigene68289_All	MYB	-1.48825	0.0065772	WE-vs-WL
Unigene42065_All	MYB	-1.48825	0.0065772	WE-vs-WL
Unigene10943_All	MYB	-4.00862	0.00890722	WE-vs-WL
Unigene71205_All	MYB	6.98783	0	RE-vs-RL
Unigene35117_All	MYB	-5.04054	0	RE-vs-RL
Unigene51459_All	MYB	8.37354	0	RE-vs-RL
Unigene41538_All	MYB	3.28466	1.59344e-255	RE-vs-RL
Unigene3347_All	MYB	1.83419	1.50315e-232	RE-vs-RL
Unigene29273_All	MYB	-7.18701	3.65382e-204	RE-vs-RL
Unigene16157_All	MYB	3.06748	6.85134e-176	RE-vs-RL
Unigene35116_All	MYB	-5.03563	1.69261e-174	RE-vs-RL
Unigene21366_All	MYB	-3.11451	1.63531e-140	RE-vs-RL
Unigene22404_All	MYB	-2.6724	2.72177e-128	RE-vs-RL
Unigene69647_All	MYB	4.88412	2.36759e-96	RE-vs-RL
Unigene41516_All	MYB	4.8331	2.12779e-84	RE-vs-RL
Unigene35118_All	MYB	-5.68688	1.22212e-76	RE-vs-RL
Unigene41537_All	MYB	1.86098	4.26606e-42	RE-vs-RL
Unigene61562_All	MYB	-1.57481	7.23604e-40	RE-vs-RL
Unigene77569_All	MYB	-4.34469	5.14812e-38	RE-vs-RL
Unigene41539_All	MYB	4.53764	3.10533e-34	RE-vs-RL
Unigene20744_All	MYB	-5.3447	1.00042e-30	RE-vs-RL
Unigene20746_All	MYB	-3.87184	4.26531e-29	RE-vs-RL
Unigene14412_All	MYB	-2.92966	1.16759e-21	RE-vs-RL
Unigene42065_All	MYB	-2.8028	2.32712e-21	RE-vs-RL
Unigene69995_All	MYB	-3.26713	7.35189e-21	RE-vs-RL
Unigene69094_All	MYB	-1.60611	1.1204e-18	RE-vs-RL
Unigene96822_All	MYB	-7.29129	2.0897e-18	RE-vs-RL
Unigene68291_All	MYB	-6.94552	4.98361e-15	RE-vs-RL
Unigene43690_All	MYB	-3.32584	2.13168e-14	RE-vs-RL
Unigene48480_All	MYB	-1.01079	4.44488e-14	RE-vs-RL
Unigene13871_All	MYB	-1.75281	1.00597e-12	RE-vs-RL
Unigene585_All	MYB	6.61467	2.29264e-12	RE-vs-RL
Unigene61821_All	MYB	1.75033	1.31533e-11	RE-vs-RL
Unigene29198_All	MYB	-1.61346	3.03891e-09	RE-vs-RL
Unigene69351_All	MYB	-1.47433	9.32565e-09	RE-vs-RL
Unigene29197_All	MYB	-3.47023	1.30391e-07	RE-vs-RL
Unigene22000_All	MYB	2.10569	3.13797e-07	RE-vs-RL
Unigene61567_All	MYB	1.26854	4.39397e-06	RE-vs-RL
Unigene75794_All	MYB	1.25913	0.00035598	RE-vs-RL
Unigene8161_All	MYB	1.45869	0.000398341	RE-vs-RL
Unigene41515_All	MYB	-2.62223	0.000777735	RE-vs-RL
Unigene16783_All	MYB	1.09825	0.00119856	RE-vs-RL
Unigene49636_All	MYB	-1.88526	0.00282165	RE-vs-RL
Unigene65364_All	MYB	-3.47023	0.00316527	RE-vs-RL
Unigene68290_All	MYB	4.23	0.00461833	RE-vs-RL
Unigene61822_All	MYB	1.02163	0.00789985	RE-vs-RL
Unigene35118_All	MYB	-2.35626	3.22099e-204	WE-vs-RE
Unigene36466_All	MYB	-2.10625	2.63587e-149	WE-vs-RE
Unigene35116_All	MYB	2.67859	4.27948e-108	WE-vs-RE
Unigene21366_All	MYB	-1.26176	1.37929e-101	WE-vs-RE
Unigene8359_All	MYB	-10.336	2.03005e-97	WE-vs-RE
Unigene48479_All	MYB	3.68155	1.62777e-90	WE-vs-RE
Unigene29273_All	MYB	1.77892	3.37287e-79	WE-vs-RE
Unigene48480_All	MYB	3.14562	6.13171e-59	WE-vs-RE
Unigene61563_All	MYB	-3.89467	1.29459e-57	WE-vs-RE
Unigene14439_All	MYB	-4.7459	1.05682e-53	WE-vs-RE
Unigene12724_All	MYB	-5.29752	1.89847e-46	WE-vs-RE
Unigene75794_All	MYB	-3.29798	7.47478e-43	WE-vs-RE
Unigene16783_All	MYB	-3.12998	3.49291e-42	WE-vs-RE
Unigene9185_All	MYB	-8.70943	4.80847e-40	WE-vs-RE
Unigene13871_All	MYB	6.76924	1.64643e-30	WE-vs-RE
Unigene14412_All	MYB	7.88172	6.45171e-27	WE-vs-RE
Unigene20746_All	MYB	-1.45183	3.75955e-25	WE-vs-RE
Unigene29196_All	MYB	-2.1959	4.66127e-25	WE-vs-RE
Unigene29198_All	MYB	4.10442	1.40288e-22	WE-vs-RE
Unigene8322_All	MYB	-1.57202	5.506e-22	WE-vs-RE
Unigene77569_All	MYB	2.2063	2.14832e-20	WE-vs-RE
Unigene41537_All	MYB	3.023	2.49702e-20	WE-vs-RE
Unigene69351_All	MYB	-1.36051	6.06513e-18	WE-vs-RE
Unigene69995_All	MYB	-1.33783	6.79792e-17	WE-vs-RE
Unigene26308_All	MYB	-7.19847	6.92253e-17	WE-vs-RE
Unigene42065_All	MYB	2.04079	1.27503e-14	WE-vs-RE
Unigene95951_All	MYB	-6.87654	5.43425e-14	WE-vs-RE
Unigene62902_All	MYB	-1.34624	5.62827e-14	WE-vs-RE
Unigene96822_All	MYB	-1.3755	4.16727e-13	WE-vs-RE
Unigene42467_All	MYB	-2.04668	1.19411e-12	WE-vs-RE
Unigene597_All	MYB	6.29676	1.23303e-10	WE-vs-RE
Unigene61821_All	MYB	-1.63164	1.40289e-09	WE-vs-RE
Unigene41516_All	MYB	-2.36416	2.68689e-09	WE-vs-RE
Unigene29197_All	MYB	6.00726	5.94349e-09	WE-vs-RE
Unigene92643_All	MYB	-6.09893	7.4683e-09	WE-vs-RE
Unigene61565_All	MYB	1.50692	2.05575e-08	WE-vs-RE
Unigene61567_All	MYB	-1.48374	3.06641e-08	WE-vs-RE
Unigene68291_All	MYB	1.95332	4.07841e-07	WE-vs-RE
Unigene43690_All	MYB	1.57976	2.04359e-06	WE-vs-RE
Unigene9580_All	MYB	2.76924	4.93803e-06	WE-vs-RE
Unigene8161_All	MYB	4.95281	8.57326e-05	WE-vs-RE
Unigene585_All	MYB	-4.99202	0.000125316	WE-vs-RE
Unigene22000_All	MYB	-1.69673	0.000194101	WE-vs-RE
Unigene75793_All	MYB	-1.55569	0.0002631	WE-vs-RE
Unigene77190_All	MYB	-4.61351	0.00098769	WE-vs-RE
Unigene13192_All	MYB	4.42229	0.00155859	WE-vs-RE
Unigene65364_All	MYB	4.42229	0.00155859	WE-vs-RE
Unigene9092_All	MYB	1.36426	0.00427562	WE-vs-RE
Unigene43277_All	MYB	4.05972	0.00684745	WE-vs-RE
Unigene71205_All	MYB	10.8888	0	WL-vs-RL
Unigene51459_All	MYB	11.7729	1.13488e-237	WL-vs-RL
Unigene21366_All	MYB	-3.30351	1.15292e-153	WL-vs-RL
Unigene61563_All	MYB	-4.23194	2.05438e-135	WL-vs-RL
Unigene8359_All	MYB	-10.7156	1.06327e-112	WL-vs-RL
Unigene36466_All	MYB	-1.59506	2.00239e-101	WL-vs-RL
Unigene16157_All	MYB	1.42631	6.9642e-62	WL-vs-RL
Unigene8322_All	MYB	-1.76128	6.85663e-43	WL-vs-RL
Unigene41537_All	MYB	-1.16391	8.34922e-43	WL-vs-RL
Unigene29196_All	MYB	-3.09893	4.54553e-33	WL-vs-RL
Unigene9185_All	MYB	-8.3893	1.16518e-31	WL-vs-RL
Unigene41539_All	MYB	7.93699	1.47547e-29	WL-vs-RL
Unigene48479_All	MYB	1.60627	2.09955e-26	WL-vs-RL
Unigene12724_All	MYB	-7.69157	2.79348e-21	WL-vs-RL
Unigene69351_All	MYB	-2.19782	4.60022e-21	WL-vs-RL
Unigene49636_All	MYB	-3.85873	6.11186e-18	WL-vs-RL
Unigene35118_All	MYB	-3.85873	6.11186e-18	WL-vs-RL
Unigene26308_All	MYB	-7.24091	2.09374e-16	WL-vs-RL
Unigene92643_All	MYB	-7.11538	2.98582e-15	WL-vs-RL
Unigene68287_All	MYB	1.37234	4.61038e-15	WL-vs-RL
Unigene9580_All	MYB	6.3317	1.70001e-11	WL-vs-RL
Unigene95951_All	MYB	-6.50394	1.14316e-10	WL-vs-RL
Unigene48480_All	MYB	1.33767	2.70001e-10	WL-vs-RL
Unigene13871_All	MYB	6.02504	1.45644e-09	WL-vs-RL
Unigene585_All	MYB	2.47347	3.91497e-07	WL-vs-RL
Unigene68289_All	MYB	2.22874	6.93562e-07	WL-vs-RL
Unigene61565_All	MYB	1.37009	2.02779e-05	WL-vs-RL
Unigene14439_All	MYB	-3.44369	5.92051e-05	WL-vs-RL
Unigene10943_All	MYB	4.86458	9.0699e-05	WL-vs-RL
Unigene9092_All	MYB	2.78513	9.77549e-05	WL-vs-RL
Unigene41515_All	MYB	-2.93673	0.00012752	WL-vs-RL
Unigene20744_All	MYB	-2.93673	0.00012752	WL-vs-RL
Unigene14412_All	MYB	4.77711	0.000157848	WL-vs-RL
Unigene29198_All	MYB	1.96327	0.000290536	WL-vs-RL
Unigene96822_All	MYB	-4.65595	0.00119722	WL-vs-RL
Unigene8161_All	MYB	1.37831	0.00124574	WL-vs-RL
Unigene61822_All	MYB	1.3112	0.00170222	WL-vs-RL
Unigene43277_All	MYB	2.72624	0.00238695	WL-vs-RL
Unigene20746_All	MYB	-1.6888	0.00242419	WL-vs-RL
Unigene68290_All	MYB	3.94704	0.00814602	WL-vs-RL
Unigene63512_All	WRKY	-3.42071	3.61406e-82	WE-vs-WL
Unigene67263_All	WRKY	2.7687	3.22545e-62	WE-vs-WL
Unigene34784_All	WRKY	-3.87201	1.08135e-43	WE-vs-WL
Unigene23832_All	WRKY	2.40876	6.66477e-39	WE-vs-WL
Unigene67853_All	WRKY	-4.25236	3.81785e-37	WE-vs-WL
Unigene67850_All	WRKY	-2.14888	2.1629e-34	WE-vs-WL
Unigene67262_All	WRKY	2.03695	9.15396e-33	WE-vs-WL
Unigene67855_All	WRKY	-7.73654	3.88331e-25	WE-vs-WL
Unigene65147_All	WRKY	-3.6992	1.43311e-23	WE-vs-WL
Unigene85915_All	WRKY	-3.23076	5.9151e-23	WE-vs-WL
Unigene68884_All	WRKY	-3.19874	1.64703e-20	WE-vs-WL
Unigene62722_All	WRKY	-1.64579	8.38346e-16	WE-vs-WL
Unigene33519_All	WRKY	-4.60159	6.14111e-13	WE-vs-WL
Unigene22996_All	WRKY	-6.25654	1.88023e-10	WE-vs-WL
Unigene67854_All	WRKY	-6.05301	3.0118e-09	WE-vs-WL
Unigene76446_All	WRKY	-1.31258	4.40831e-09	WE-vs-WL
Unigene10005_All	WRKY	-1.35005	1.15187e-07	WE-vs-WL
Unigene3414_All	WRKY	-3.65818	1.9059e-06	WE-vs-WL
Unigene21623_All	WRKY	-1.79424	8.2547e-06	WE-vs-WL
Unigene78207_All	WRKY	-4.12766	4.39956e-05	WE-vs-WL
Unigene79980_All	WRKY	-4.91551	0.000113154	WE-vs-WL
Unigene63070_All	WRKY	1.20576	0.000450072	WE-vs-WL
Unigene67851_All	WRKY	4.68526	0.000997821	WE-vs-WL
Unigene38940_All	WRKY	-3.41717	0.00349213	WE-vs-WL
Unigene36987_All	WRKY	4.22583	0.00689973	WE-vs-WL
Unigene62722_All	WRKY	-6.26009	0	RE-vs-RL
Unigene16090_All	WRKY	2.21625	0	RE-vs-RL
Unigene63512_All	WRKY	-4.31921	0	RE-vs-RL
Unigene34782_All	WRKY	-2.52895	6.52842e-289	RE-vs-RL
Unigene67262_All	WRKY	-2.44999	2.23556e-262	RE-vs-RL
Unigene85915_All	WRKY	-5.50564	8.19592e-212	RE-vs-RL
Unigene63070_All	WRKY	-5.22313	5.65484e-164	RE-vs-RL
Unigene65147_All	WRKY	-9.82386	9.07622e-159	RE-vs-RL
Unigene48327_All	WRKY	-2.21532	1.56963e-136	RE-vs-RL
Unigene5026_All	WRKY	3.85813	1.16828e-133	RE-vs-RL
Unigene49288_All	WRKY	-1.95238	4.04651e-132	RE-vs-RL
Unigene37241_All	WRKY	-5.93693	7.5747e-121	RE-vs-RL
Unigene22996_All	WRKY	-10.3521	6.85499e-102	RE-vs-RL
Unigene67263_All	WRKY	-2.94615	6.6493e-77	RE-vs-RL
Unigene23832_All	WRKY	5.04311	7.28531e-50	RE-vs-RL
Unigene62835_All	WRKY	-3.8028	4.76647e-45	RE-vs-RL
Unigene34936_All	WRKY	-5.65785	4.17679e-38	RE-vs-RL
Unigene68884_All	WRKY	-2.66828	4.05218e-37	RE-vs-RL
Unigene21623_All	WRKY	-1.74153	5.46141e-36	RE-vs-RL
Unigene6073_All	WRKY	1.53672	1.1952e-30	RE-vs-RL
Unigene13334_All	WRKY	-4.90516	1.57053e-22	RE-vs-RL
Unigene6532_All	WRKY	1.76716	3.471e-19	RE-vs-RL
Unigene26332_All	WRKY	-7.16791	3.99594e-17	RE-vs-RL
Unigene15747_All	WRKY	-3.39984	2.34346e-15	RE-vs-RL
Unigene84868_All	WRKY	-6.81999	5.86071e-14	RE-vs-RL
Unigene67856_All	WRKY	3.06227	9.04085e-14	RE-vs-RL
Unigene62834_All	WRKY	-3.79215	1.03539e-12	RE-vs-RL
Unigene34783_All	WRKY	-1.42583	4.8872e-11	RE-vs-RL
Unigene62357_All	WRKY	-1.35825	7.18339e-11	RE-vs-RL
Unigene8913_All	WRKY	1.67168	9.32389e-10	RE-vs-RL
Unigene21624_All	WRKY	-1.25807	5.40407e-08	RE-vs-RL
Unigene34934_All	WRKY	-2.4523	5.88117e-08	RE-vs-RL
Unigene78207_All	WRKY	-5.68248	4.19033e-07	RE-vs-RL
Unigene67854_All	WRKY	5.64504	6.0035e-07	RE-vs-RL
Unigene3414_All	WRKY	-1.3905	2.41055e-06	RE-vs-RL
Unigene81777_All	WRKY	-1.48934	4.04964e-06	RE-vs-RL
Unigene23910_All	WRKY	2.97272	4.85785e-06	RE-vs-RL
Unigene34784_All	WRKY	-1.10766	9.1318e-06	RE-vs-RL
Unigene36987_All	WRKY	-2.19339	5.61657e-05	RE-vs-RL
Unigene16952_All	WRKY	-1.41578	0.000292081	RE-vs-RL
Unigene43011_All	WRKY	-1.3003	0.000313742	RE-vs-RL
Unigene53484_All	WRKY	-4.68248	0.000597832	RE-vs-RL
Unigene38940_All	WRKY	-4.68248	0.000597832	RE-vs-RL
Unigene73202_All	WRKY	-4.68248	0.000597832	RE-vs-RL
Unigene67851_All	WRKY	-1.52269	0.00581233	RE-vs-RL
Unigene62722_All	WRKY	4.34053	0	WE-vs-RE
Unigene67262_All	WRKY	4.55309	0	WE-vs-RE
Unigene63512_All	WRKY	1.90714	1.3814e-177	WE-vs-RE
Unigene63070_All	WRKY	4.5177	4.82179e-151	WE-vs-RE
Unigene65147_All	WRKY	2.85089	1.61029e-144	WE-vs-RE
Unigene48327_All	WRKY	2.20825	4.15665e-131	WE-vs-RE
Unigene85915_All	WRKY	2.66409	2.34642e-128	WE-vs-RE
Unigene22996_All	WRKY	3.81239	3.38625e-128	WE-vs-RE
Unigene37241_All	WRKY	6.70542	6.82873e-114	WE-vs-RE
Unigene34782_All	WRKY	1.18294	8.47886e-98	WE-vs-RE
Unigene55736_All	WRKY	10.037	2.34872e-89	WE-vs-RE
Unigene67263_All	WRKY	2.79127	2.5516e-70	WE-vs-RE
Unigene3127_All	WRKY	9.53777	3.87652e-68	WE-vs-RE
Unigene21623_All	WRKY	2.72415	1.14714e-59	WE-vs-RE
Unigene62835_All	WRKY	4.67084	1.95464e-48	WE-vs-RE
Unigene34936_All	WRKY	3.42635	1.73449e-29	WE-vs-RE
Unigene21624_All	WRKY	4.72701	2.28719e-29	WE-vs-RE
Unigene6073_All	WRKY	3.68024	6.34527e-28	WE-vs-RE
Unigene13334_All	WRKY	7.44219	7.09326e-21	WE-vs-RE
Unigene42165_All	WRKY	-2.02923	2.80868e-18	WE-vs-RE
Unigene15747_All	WRKY	4.97569	3.45761e-18	WE-vs-RE
Unigene81777_All	WRKY	7.08526	6.00805e-17	WE-vs-RE
Unigene26332_All	WRKY	7.05972	1.07401e-16	WE-vs-RE
Unigene76446_All	WRKY	1.03589	1.10611e-13	WE-vs-RE
Unigene84868_All	WRKY	4.52823	3.13155e-13	WE-vs-RE
Unigene6532_All	WRKY	-1.51616	6.67414e-13	WE-vs-RE
Unigene42164_All	WRKY	1.66636	1.11949e-12	WE-vs-RE
Unigene16952_All	WRKY	6.53777	2.85695e-12	WE-vs-RE
Unigene23832_All	WRKY	-3.2817	6.00581e-12	WE-vs-RE
Unigene34784_All	WRKY	-1.15359	7.1744e-12	WE-vs-RE
Unigene33519_All	WRKY	-3.25313	1.17897e-11	WE-vs-RE
Unigene62834_All	WRKY	3.23872	5.00957e-11	WE-vs-RE
Unigene67854_All	WRKY	-6.33597	3.51745e-10	WE-vs-RE
Unigene36987_All	WRKY	5.95281	1.14671e-08	WE-vs-RE
Unigene67855_All	WRKY	-1.33719	1.89654e-08	WE-vs-RE
Unigene2041_All	WRKY	5.83733	4.32079e-08	WE-vs-RE
Unigene7539_All	WRKY	2.35831	4.36951e-08	WE-vs-RE
Unigene5026_All	WRKY	2.87615	5.23155e-08	WE-vs-RE
Unigene67851_All	WRKY	5.64469	3.24952e-07	WE-vs-RE
Unigene3414_All	WRKY	1.41275	2.56885e-06	WE-vs-RE
Unigene34934_All	WRKY	1.9313	4.9155e-06	WE-vs-RE
Unigene17502_All	WRKY	-5.29158	1.65951e-05	WE-vs-RE
Unigene43011_All	WRKY	1.52823	5.2999e-05	WE-vs-RE
Unigene23910_All	WRKY	-2.66817	0.000143551	WE-vs-RE
Unigene53484_All	WRKY	4.5743	0.000748683	WE-vs-RE
Unigene73202_All	WRKY	4.5743	0.000748683	WE-vs-RE
Unigene67856_All	WRKY	4.05972	0.00684745	WE-vs-RE
Unigene16090_All	WRKY	1.87894	0	WL-vs-RL
Unigene5026_All	WRKY	8.01395	1.67331e-124	WL-vs-RL
Unigene6073_All	WRKY	6.02269	1.78841e-88	WL-vs-RL
Unigene55736_All	WRKY	5.27203	2.32226e-73	WL-vs-RL
Unigene67263_All	WRKY	-2.92358	1.37167e-68	WL-vs-RL
Unigene3127_All	WRKY	8.08818	1.38878e-65	WL-vs-RL
Unigene49288_All	WRKY	-1.20259	4.96083e-36	WL-vs-RL
Unigene76446_All	WRKY	2.15508	1.43238e-31	WL-vs-RL
Unigene8913_All	WRKY	4.07673	1.6207e-21	WL-vs-RL
Unigene67853_All	WRKY	3.45416	5.30494e-20	WL-vs-RL
Unigene21623_All	WRKY	2.77686	5.22131e-18	WL-vs-RL
Unigene67855_All	WRKY	7.08089	6.01413e-18	WL-vs-RL
Unigene67856_All	WRKY	6.94704	1.39172e-16	WL-vs-RL
Unigene67850_All	WRKY	1.55405	5.85602e-16	WL-vs-RL
Unigene42164_All	WRKY	1.52594	7.17358e-14	WL-vs-RL
Unigene21624_All	WRKY	5.42667	1.16293e-12	WL-vs-RL
Unigene62357_All	WRKY	-1.22567	4.90764e-08	WL-vs-RL
Unigene63070_All	WRKY	-1.91119	2.08364e-07	WL-vs-RL
Unigene2041_All	WRKY	5.58447	2.4611e-07	WL-vs-RL
Unigene3414_All	WRKY	3.68043	6.73083e-07	WL-vs-RL
Unigene81777_All	WRKY	5.42097	1.19758e-06	WL-vs-RL
Unigene67854_All	WRKY	5.36208	2.0409e-06	WL-vs-RL
Unigene17502_All	WRKY	-5.33402	2.25304e-05	WL-vs-RL
Unigene16952_All	WRKY	4.94704	5.23626e-05	WL-vs-RL
Unigene34784_All	WRKY	1.61076	0.000132535	WL-vs-RL
Unigene63512_All	WRKY	1.00863	0.00028596	WL-vs-RL
Unigene68884_All	WRKY	1.47626	0.00186456	WL-vs-RL
Unigene57162_All	WRKY	3.42668	0.00230732	WL-vs-RL
